# Supplementary material for: Polygenic risk associations with developmental and mental health outcomes in childhood and adolescence: A systematic review
Source: bioRxiv or medRxiv preprint supplement (doi:10.1101/2023.03.31.23287877), 2023-03-31
Supplement: Supplementary file [file media-1.pdf]

**Table 1: Characteristics of included studies - PRS and neurodevelopmental outcomes**

| Reference                              | Discovery Cohort                                                                                                                                                                                                                                               | Target Cohort                                                                                                        | Age (years) | Outcome phenotype (scale)                                                                                                                                                                                                                                                                                                                                                                                                            | Sample Size                                                                                                | Polygenic Risk Score                                                                         | Relevant findings                                                                                                          |
|----------------------------------------|----------------------------------------------------------------------------------------------------------------------------------------------------------------------------------------------------------------------------------------------------------------|----------------------------------------------------------------------------------------------------------------------|-------------|--------------------------------------------------------------------------------------------------------------------------------------------------------------------------------------------------------------------------------------------------------------------------------------------------------------------------------------------------------------------------------------------------------------------------------------|------------------------------------------------------------------------------------------------------------|----------------------------------------------------------------------------------------------|----------------------------------------------------------------------------------------------------------------------------|
| <b>(Aguilar-Lacasaña et al., 2020)</b> | <ul style="list-style-type: none"> <li>ADHD GWAS N= 55 374</li> <li>ASD GWAS N= 46 351</li> </ul>                                                                                                                                                              | Population-based cohort (BREATHE project)                                                                            | 7 - 11      | <ul style="list-style-type: none"> <li>Working Memory: n-back task</li> <li>Attention performance: n-back task, ANT (computer version)</li> <li>ADHD symptoms: DSM-IV</li> </ul>                                                                                                                                                                                                                                                     | N= 1667                                                                                                    | <ul style="list-style-type: none"> <li>ADHD PRS</li> <li>ASD PRS</li> </ul>                  | <ul style="list-style-type: none"> <li>↑ADHD PRS assoc with</li> <li>↓working memory performance</li> </ul>                |
| <b>(Jansen et al., 2020)</b>           | <ul style="list-style-type: none"> <li>Discovery sample ADHD cases N= 20 183, controls N= 35 191</li> <li>Discovery sample ASD cases N= 18 381, controls N= 27 969</li> <li>Discovery sample SCZ cases N= 40 675, controls N=64 643</li> <li>NESCOG</li> </ul> | “Inside out” outpatient sample <ul style="list-style-type: none"> <li>ADHD</li> <li>ASD</li> <li>Controls</li> </ul> | 6 - 18      | <ul style="list-style-type: none"> <li>ADHD symptoms (CBCL 1.5-5)</li> <li>ASD symptoms</li> </ul>                                                                                                                                                                                                                                                                                                                                   | <ul style="list-style-type: none"> <li>ADHD/ASD N= 688</li> <li>ADHD N= 280</li> <li>ASD N= 295</li> </ul> | <ul style="list-style-type: none"> <li>ADHD PRS</li> <li>ASD PRS</li> <li>SCZ PRS</li> </ul> | ADHD PRS assoc with : <ul style="list-style-type: none"> <li>ADHD symptoms</li> <li>Combined ADHD /ASD symptoms</li> </ul> |
| <b>(Martin et al., 2015)</b>           | GWAS of British & Irish children with ADHD diagnosis cases N=727 and controls N= 5081                                                                                                                                                                          | ALSPAC                                                                                                               | 7 - 10      | <ul style="list-style-type: none"> <li>IQ (WISC-III)</li> <li>Verbal working memory: WISC-III digit span task</li> <li>Cognitive inhibitory control: Diagnostic Analysis of the Faces subtest, Counting span task (TEACH), Opposite worlds task</li> <li>Facial emotional recognition</li> <li>ADHD inattentive &amp; impulsive traits: DAWBA</li> <li>social communication: SCDC</li> <li>pragmatic language scales: CCC</li> </ul> | N= 6832                                                                                                    | <ul style="list-style-type: none"> <li>ADHD PRS (in children)</li> </ul>                     | ADHD PRS assoc with: <ul style="list-style-type: none"> <li>↓IQ &amp; working memory performance</li> </ul>                |

|                                      |                                                                                                                                                                                  |               |          |                                                                                                                                                                                                                                                                                                                                                                                                                                                                                                                                                                                                                                                                                                                                                                                                     |                |                 |                                                                                                                                                               |
|--------------------------------------|----------------------------------------------------------------------------------------------------------------------------------------------------------------------------------|---------------|----------|-----------------------------------------------------------------------------------------------------------------------------------------------------------------------------------------------------------------------------------------------------------------------------------------------------------------------------------------------------------------------------------------------------------------------------------------------------------------------------------------------------------------------------------------------------------------------------------------------------------------------------------------------------------------------------------------------------------------------------------------------------------------------------------------------------|----------------|-----------------|---------------------------------------------------------------------------------------------------------------------------------------------------------------|
| <p><b>(Mistry et al., 2019b)</b></p> | <p>PGC working groups:</p> <ul style="list-style-type: none"> <li>• BD</li> <li>• SCZ</li> <li>• SCZ vs BD GWAS</li> </ul> <p>BD cases N= 20 129<br/>and SCZ cases N= 33 426</p> | <p>ALSPAC</p> | <p>8</p> | <ul style="list-style-type: none"> <li>○ Cognitive domains : (WISC-III)</li> </ul> <p>General intelligence:</p> <ul style="list-style-type: none"> <li>○ Verbal IQ: (derived from the information, similarities, arithmetic, vocabulary, comprehension, and forward and backward digit span subtests)</li> <li>○ Performance IQ: (derived from the picture completion, picture arrangement, block design, coding and object assembly subtests)</li> <li>○ Total IQ: (sum of PIQ and VIQ)</li> <li>○ Processing speed: (WISC-III)</li> <li>○ Working memory: (Freedom from distractibility score)</li> <li>○ Problem-solving: (WISC-III)</li> <li>○ Executive function: (TEACH)</li> <li>○ Attention: (TEACH)</li> <li>○ Verbal Learning: (CTNWR)</li> <li>○ Emotion recognition: (DANVA)</li> </ul> | <p>N= 8230</p> | <p>- BD PRS</p> | <p>BD PRS assoc with :</p> <ul style="list-style-type: none"> <li>- ↓executive functioning</li> <li>- ↓processing speed</li> <li>- ↓performance IQ</li> </ul> |
|--------------------------------------|----------------------------------------------------------------------------------------------------------------------------------------------------------------------------------|---------------|----------|-----------------------------------------------------------------------------------------------------------------------------------------------------------------------------------------------------------------------------------------------------------------------------------------------------------------------------------------------------------------------------------------------------------------------------------------------------------------------------------------------------------------------------------------------------------------------------------------------------------------------------------------------------------------------------------------------------------------------------------------------------------------------------------------------------|----------------|-----------------|---------------------------------------------------------------------------------------------------------------------------------------------------------------|

**Table 2: Characteristics of included studies – PRS and mental health outcomes**

| Reference                     | Discovery Cohort                                                                                                                                                                                                                                                                  | Target Cohort | Age (years) | Outcome phenotype (scale)                                                                                                                                                                                                                                                                                                                                                                                                                                                                                                                                                                                                                                              | Sample Size | Polygenic Risk Score                                                                                                                    | Relevant findings                                                                                                                         |
|-------------------------------|-----------------------------------------------------------------------------------------------------------------------------------------------------------------------------------------------------------------------------------------------------------------------------------|---------------|-------------|------------------------------------------------------------------------------------------------------------------------------------------------------------------------------------------------------------------------------------------------------------------------------------------------------------------------------------------------------------------------------------------------------------------------------------------------------------------------------------------------------------------------------------------------------------------------------------------------------------------------------------------------------------------------|-------------|-----------------------------------------------------------------------------------------------------------------------------------------|-------------------------------------------------------------------------------------------------------------------------------------------|
| <b>Akingbuwa et al., 2020</b> | <p>GWAS data from 7 cohorts:</p> <ul style="list-style-type: none"> <li>• ALSPAC</li> <li>• Child and adolescent twin study (Sweden)</li> <li>• Generation R</li> <li>• MoBa</li> <li>• Northern Finland Birth Cohort of 1986</li> <li>• Twins Early Development Study</li> </ul> | Meta-analysis | 6 – 17      | <ul style="list-style-type: none"> <li>○ ADHD symptoms</li> <li>○ Internalising symptoms</li> <li>○ Social problems</li> </ul> <p>Scales used:</p> <ul style="list-style-type: none"> <li>○ SDQ</li> <li>○ CBCL</li> <li>○ CBCL(Youth Self Report)</li> <li>○ SDQ (Conners' Parent Rating Scale)</li> <li>○ Autism-Tics, ADHD and Other Comorbidities Inventory</li> <li>○ Screen for Child Anxiety Related Emotional Disorders</li> <li>○ Short Mood and Feelings Questionnaire</li> <li>○ Screen for Child Anxiety Related Emotional Disorders</li> <li>○ Short Mood and Feelings Questionnaire</li> <li>○ Rating Scale for Disruptive Behavior Disorders</li> </ul> | N= 42 998   | <ul style="list-style-type: none"> <li>- MDD PRS</li> <li>- NEU PRS</li> </ul>                                                          | <p>MD PRS assoc with :</p> <ul style="list-style-type: none"> <li>- Childhood ADHD symptoms,</li> <li>- Internalising problems</li> </ul> |
| <b>Kwong et al., 2021</b>     | <p>PGC working groups:</p> <ul style="list-style-type: none"> <li>• DEP</li> <li>• MDD</li> <li>• ANX</li> <li>• NEU</li> <li>• SCZ</li> </ul>                                                                                                                                    | ALSPAC        | 10 - 24     | <ul style="list-style-type: none"> <li>○ Depressive symptoms (self-reported) (SMFQ)</li> </ul>                                                                                                                                                                                                                                                                                                                                                                                                                                                                                                                                                                         | N= 6302     | <ul style="list-style-type: none"> <li>- DEP PRS</li> <li>- MDD PRS</li> <li>- ANX PRS</li> <li>- NEU PRS</li> <li>- SCZ PRS</li> </ul> | <ul style="list-style-type: none"> <li>- ↑ PRS for DEP, MDD, NEU: assoc with adverse DEP symptoms</li> </ul>                              |

|                                 |                                                                                                    |                                                                           |         |                                                                                                                                                                                                                                                                                                       |                                                                                            |                                                                                                    |                                                                              |
|---------------------------------|----------------------------------------------------------------------------------------------------|---------------------------------------------------------------------------|---------|-------------------------------------------------------------------------------------------------------------------------------------------------------------------------------------------------------------------------------------------------------------------------------------------------------|--------------------------------------------------------------------------------------------|----------------------------------------------------------------------------------------------------|------------------------------------------------------------------------------|
| <b>(Mistry et al., 2019a)</b>   | PGC-BD                                                                                             | ALSPAC                                                                    | 7 - 11  | <ul style="list-style-type: none"> <li>○ Emotional and Behavioural difficulties: SDQ</li> <li>○ Assessment of childhood ADHD: DAWBA and DSM-IV</li> <li>○ Assessment of borderline personality trait: CI-BPD</li> </ul>                                                                               | N= 8230                                                                                    | - BD PRS                                                                                           | - BD PRS assoc with ADHD symptoms                                            |
| <b>(Nivard et al., 2017)</b>    | PGC -SCZ2                                                                                          | <ul style="list-style-type: none"> <li>• NTR</li> <li>• ALSPAC</li> </ul> | 7 - 15  | <p>NTR:</p> <ul style="list-style-type: none"> <li>○ Psychopathology: DSM-IV</li> <li>○ Anxiety: CBCL (maternal rating)</li> <li>○ Depression: CBCL</li> <li>○ OCD/ODD: CBCL (maternal rating)</li> </ul> <p>ALSPAC:</p> <ul style="list-style-type: none"> <li>○ Psychopathology: (DAWBA)</li> </ul> | <ul style="list-style-type: none"> <li>• NTR: N=2588</li> <li>• ALSPAC: N= 6127</li> </ul> | - SCZ PRS                                                                                          | - SCZ PRS assoc with childhood psychopathology                               |
| <b>(Rice et al., 2019)</b>      | <ul style="list-style-type: none"> <li>• PGC-MDD</li> <li>• PGC-ADHD</li> <li>• PGC-SCZ</li> </ul> | ALSPAC                                                                    | 10 - 18 | <ul style="list-style-type: none"> <li>○ Depressive symptoms trajectories : SMFQ</li> </ul>                                                                                                                                                                                                           | N= 7543                                                                                    | <ul style="list-style-type: none"> <li>- MDD PRS</li> <li>- SCZ PRS</li> <li>- ADHD PRS</li> </ul> | - MDD, ADHD and SCZ PRS assoc with DEP symptoms (age 12)                     |
| <b>(Salvatore et al., 2015)</b> | COGA adult GWAS                                                                                    | COGA                                                                      | 12 - 17 | <ul style="list-style-type: none"> <li>○ Subclinical externalising behaviour externalising disorders psychiatric interview</li> <li>○ Impulsivity-related traits: externalising disorders psychiatric interview</li> </ul>                                                                            | N= 248                                                                                     | - Externalising disorders PRS                                                                      | - Externalising disorders PRS assoc with subclinical externalising behaviour |

|                                |                                                                                 |      |               |                                                                                                                                                                                                                                                                                                   |           |                                                                                 |                                                                                                                                                                                        |
|--------------------------------|---------------------------------------------------------------------------------|------|---------------|---------------------------------------------------------------------------------------------------------------------------------------------------------------------------------------------------------------------------------------------------------------------------------------------------|-----------|---------------------------------------------------------------------------------|----------------------------------------------------------------------------------------------------------------------------------------------------------------------------------------|
| <b>(Riglin et al., 2018)</b>   | <ul style="list-style-type: none"> <li>• PGC- SCZ</li> <li>• PGC-MDD</li> </ul> | NCDS | 7 - 16        | <ul style="list-style-type: none"> <li>○ Emotional problems</li> <li>○ Parent report of two depression/anxiety items: Rutter A scale for children (abbreviated version)</li> </ul>                                                                                                                | N= 5257   | <ul style="list-style-type: none"> <li>- ADHD PRS</li> <li>- MDD PRS</li> </ul> | <ul style="list-style-type: none"> <li>- SCZ PRS assoc with emotional problems (age 7)</li> </ul>                                                                                      |
| <b>(Hannigan et al., 2021)</b> | PGC-SCZ                                                                         | MoBa | 18 months - 8 | <ul style="list-style-type: none"> <li>○ Emotional and behavioural psychopathology: (BCL</li> <li>○ Anxiety: SCARED</li> <li>○ Depression: (MFQ</li> <li>○ Disruptive Behaviour Disorders: RS-DBD</li> <li>○ Conduct problems: RS-DBD</li> <li>○ Hyperactivity and inattention: RS-DBD</li> </ul> | N= 15 105 | <ul style="list-style-type: none"> <li>- SCZ PRS</li> </ul>                     | <ul style="list-style-type: none"> <li>- ↑ SCZ PRS assoc with ↑ behavioural and emotional problems</li> <li>- ↑ symptoms of conduct disorder, ODD, ADHD in middle childhood</li> </ul> |

- **Phenotypes:** DEP=depression, MDD= major depressive disorder, ANX= anxiety, NEU= neuroticism and SCZ= schizophrenia SLI= specific language impairment, ASD= Autism spectrum disorder
- **Measures:** SMFQ= short mood and feelings questionnaire; WISC-III= Wechsler Intelligence Scale - III; TEACH= Test of Everyday Attention for Children; DANVA= Diagnostic Analysis of Nonverbal Accuracy; CI-BPD= the Childhood Interview for DSM-IV Borderline Personality Disorder; SCDC= Social & communication Disorders Checklist; CCC= Children’s Communication Checklist, K-SADS Danish version of Schedule for Affective Disorders and Schizophrenia for School-Age Children; TROG-2= Test for Reception of Grammar (Danish version); RIST= Reynolds Intellectual Screening Test. SCARED= Screen for Child Anxiety Related Disorders; RS-DBD= Rating Scale for Disruptive Behaviour Disorders; HRTSE= Hit reaction time; ANT= Attention Network Test; CTNWR= Children’s Test of Nonword Repetition
- **Cohorts:** PGC= Psychiatric Genomics Consortium, ALSPAC= Avon Longitudinal Study of Parents and Children; COGA = Collaborative Study on the Genetics of Alcoholism, NCDS= National Child Development Study, SAGE= Study of ADHD, Genes and Environment, MoBa= Norwegian Mother, Father, and Child Cohort, NTR= Netherlands Twin Registry, NESCOG= Netherlands Study of Cognition, Environment and Genes, BREATHE = BRain dEvelopment and Air polluTion ultrafine particles in scHool childrEn
- N’s shown only for summary statistics generated by each particular study
- ↑ denotes an increase or higher variable
- ↓ denotes a decrease in a particular variable
